# Supplementary material
Source: PubMed Central journal article supplement (PMC2785345)

**Supplemental Fig 1. Ganglioside loading of Neuro2a cells enhances the entry of HCR/T.**

Neuro2a cells were loaded with the indicated ganglioside. Cells were washed and incubated with 100 nM HCR/T and 10  $\mu$ g/ml of Alexa Fluor 488-Transferrin for 30 min at 37°C. HCR/T was visualized by immunofluorescence using a mouse  $\alpha$ -FLAG antibody followed by Alexa Fluor 594-coupled secondary IgG.

**Supplemental Fig 2. Incorporation of exogenous gangliosides in PC12 cells treated with PPMP.**

PC12 cells were incubated with 25  $\mu$ M PPMP for 48 h and then loaded with 100  $\mu$ g/ml of the indicated ganglioside for 24 h in the presence of 25  $\mu$ M PPMP. (a) Loading of GM1a was monitored by incubating cells with 4 nM Alexa Fluor 488-conjugated cholera toxin B subunit (CTB) for 30 min at 37 °C. (b) GD3- and GT1b- loaded PC12 cells were washed, fixed with 4% para-formaldehyde for 10 min, and incubated with  $\alpha$ -GD3 IgG (R24, Abcam) or  $\alpha$ -GT1b IgG (Seikagaku America, Inc.). Bound IgG was visualized by using a goat  $\alpha$ -mouse IgG-Alexa Fluor 488 conjugate.

Supplemental figure 1

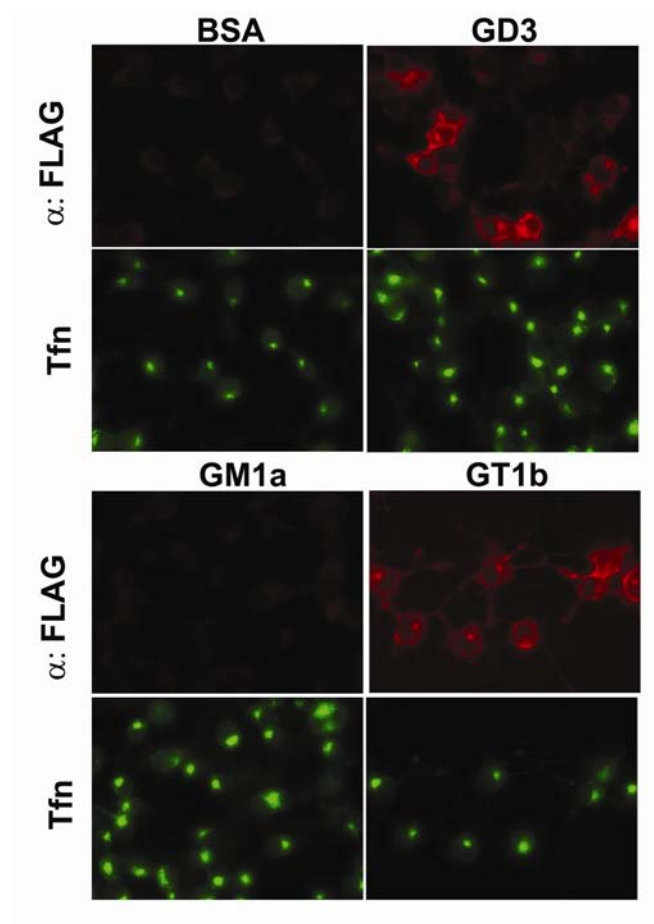

Supplemental figure 2

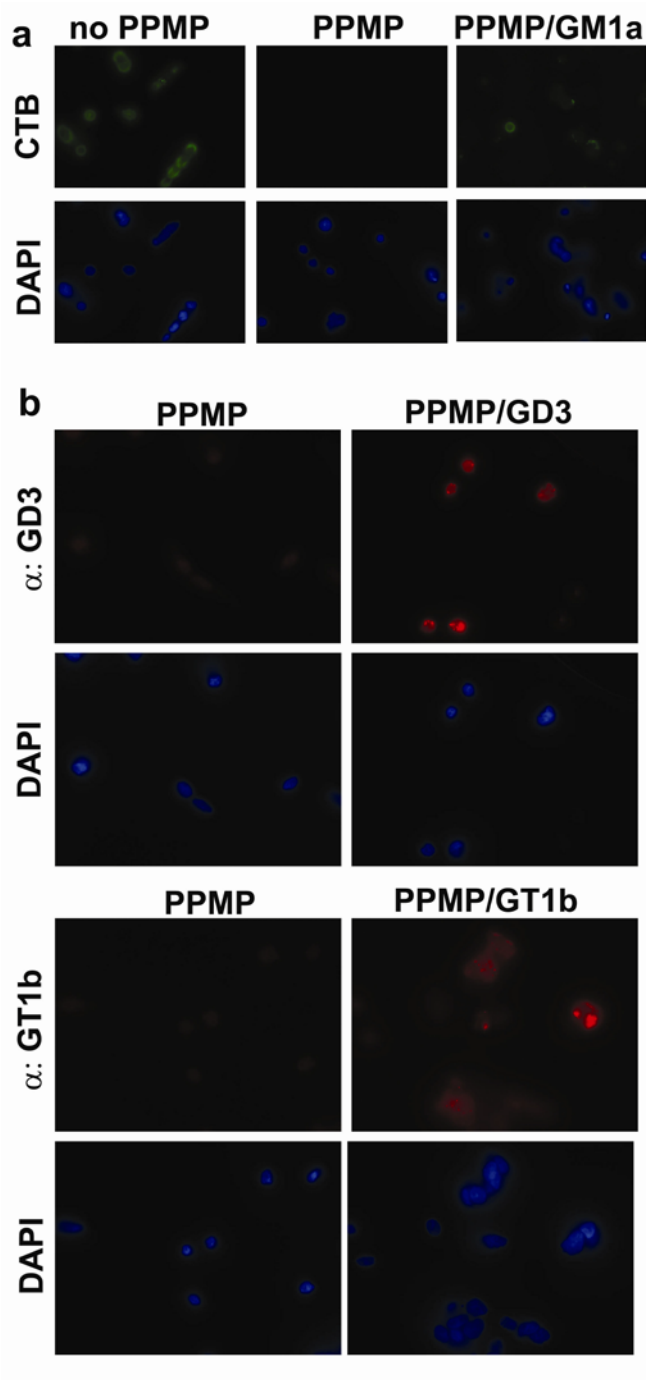

Supplement: supp_M109.027391_jbc.M109.027391-1.pdf [file supp_M109.027391_jbc.M109.027391-1.pdf]
